# Supplementary material for: GmbZIP152, a Soybean bZIP Transcription Factor, Confers Multiple Biotic and Abiotic Stress Responses in Plant
Source: MDPI journal article supplement (doi:10.3390/ijms231810935), 2022-09-19
Supplement: s1 [file s1]

**Supplemental Figure S1.** Bioinformatics analysis of *GmbZIP152*. (A) The gene structure analysis. (B) The conserved bZIP domain analysis. (C) Multiple alignments of the conserved DNA-binding region and leucine zipper region between GmbZIP33, OsbZIP38, and AtbZIP53. (D) The stress-related *cis*-elements in *GmbZIP152* promoter.

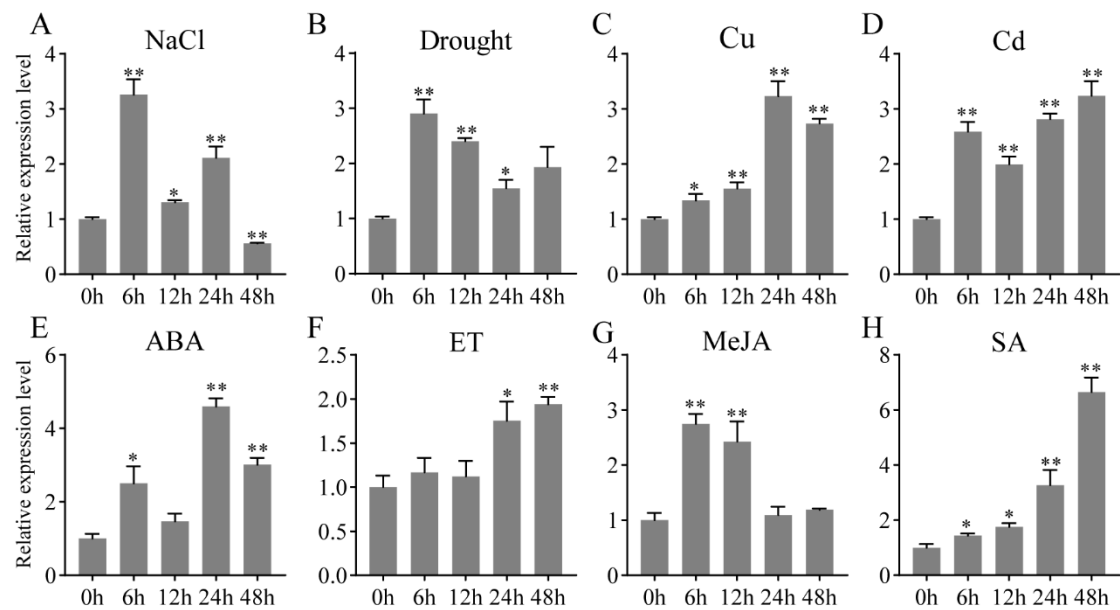

**Supplemental Figure S2.** Expression pattern of the *GmbZIP152* gene revealed by quantitative PCR analysis from different treatments in mature soybean. (A)-(D) *GmbZIP152* expression in response to various abiotic stress treatments (150 mM NaCl, 400 mM Mannitol, 150  $\mu$ M CuSO<sub>4</sub>, and 150  $\mu$ M CdSO<sub>4</sub>). (E)-(H) *GmbZIP152* expression in response to various hormone treatments [1.0  $\mu$ M Absciscic acid (ABA), 150 $\mu$ M Methyl jasmonic acid (MeJA), 400  $\mu$ M Ethylene (ETH), and 250  $\mu$ M Salicylic acid (SA)]. Errors bars indicate  $\pm$  SD of three biological replicates. Asterisks indicate significant differences for the indicated comparisons based on a Student's t-test (\*\*p < 0.01; 0.01 < \*p < 0.05).

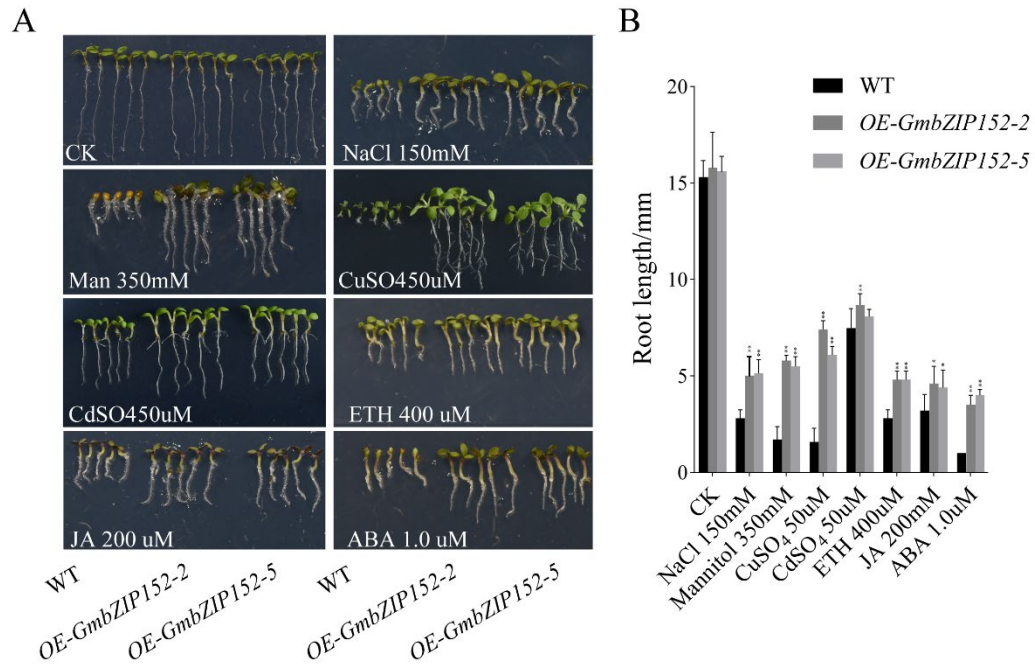

**Supplemental Figure S3.** Phenotypic analysis of *GmbZIP152* transgenic *Arabidopsis* plants in response to salt, drought, heavy metal, plant hormones treatment in *Arabidopsis*. (A) The diagram of root length comparison (scale bar, 1 cm). (B) Calculation of the seedlings' root length. Control check (CK), Absciscic acid (ABA), Methyl jasmonic acid (MeJA), Ethylene (ETH), and Salicylic acid (SA). *GmbZIP152* transgenic *Arabidopsis* plants (*OE-GmbZIP152-2* and *OE-GmbZIP152-5*, two independent transgenic lines). Errors bars indicate  $\pm$  SD of three biological replicates. Experiments were repeated three times. Asterisks indicate significant differences for the indicated comparisons based on a Students' t-test (\*\* $p < 0.01$ ;  $0.01 < *p < 0.05$ ).

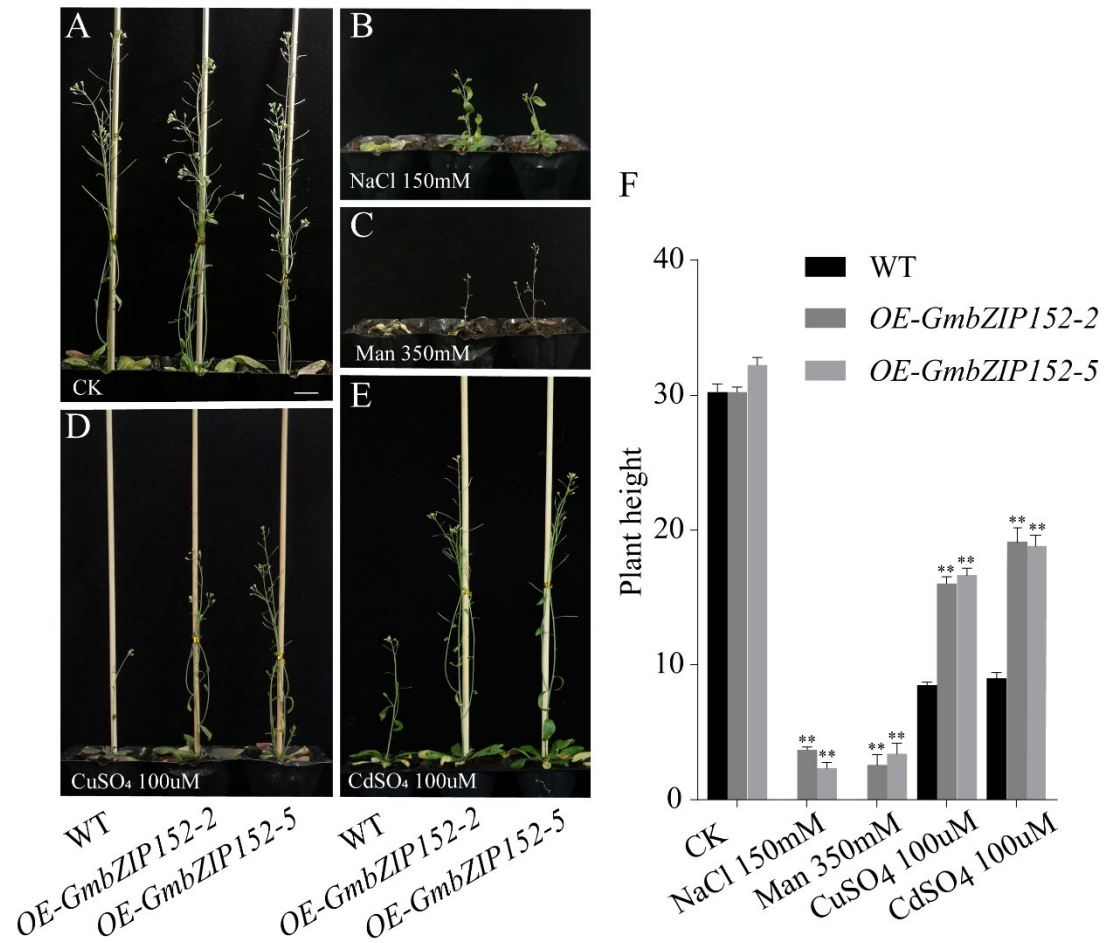

**Supplemental Figure S4.** Phenotypic analysis of *GmbZIP152* transgenic *Arabidopsis* plants in response to salt, drought, heavy metal, plant hormones treatment in *Arabidopsis*. (A)-(E) The diagram of root length comparison. (F) Calculation of the plant height. Control check (CK), *GmbZIP152* transgenic *Arabidopsis* plants (OE-*GmbZIP152-2* and OE-*GmbZIP152-5*, two independent transgenic lines). Errors bars indicate  $\pm$  SD of three biological replicates. Asterisks indicate significant differences for the indicated comparisons based on a Students' t-test (\*\* $p < 0.01$ ;  $0.01 < *p < 0.05$ ).

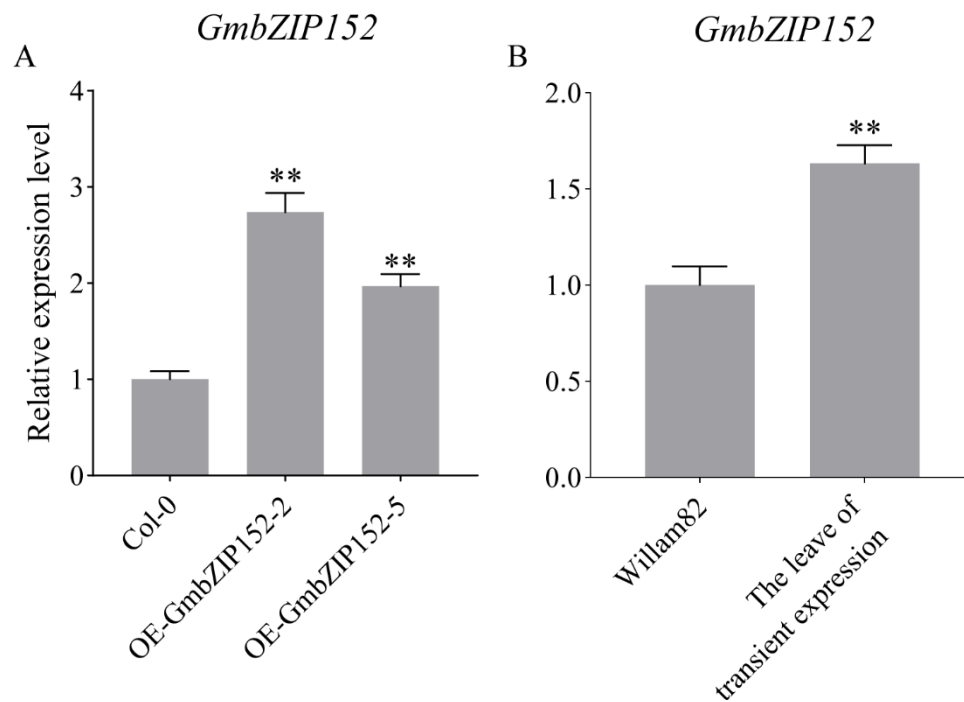

**Supplemental Figure S5.** Analysis of expression level of *GmbZIP152* in transgenic *Arabidopsis* plants and in the transient expression assay. (A) Relative expression level of *GmbZIP152* in Col-0, OE-*GmbZIP152-2*, and OE-*GmbZIP152-5*. (B) Relative expression level of *GmbZIP152* in William82 and the leave of transient expression. *GmbZIP152* transgenic *Arabidopsis* plants (OE-*GmbZIP152-2* and OE-*GmbZIP152-5*, two independent transgenic lines). The error bars indicate  $\pm$ SD (n=3 replicates). Asterisks indicate significant differences for the indicated comparisons based on a Student's t-test (\*\* $p < 0.01$ ; 0.01  $< *p < 0.05$ ).
